# Supplementary material
Source: PubMed Central journal article supplement (PMC3199993)

## **Differential Roles of Unsaturated and Saturated Fatty Acids on Autophagy and Apoptosis in Hepatocytes**

**Shuang Mei, Hong-Min Ni, Sharon Manley, Abigail Bockus, Karen M Kassel,  
James P Luyendyk, Bryan L Copple, and Wen-Xing Ding\***

### **Supplemental Materials and Methods**

**Primary hepatocytes culture.** As described previously (Ding et al., 2004), murine hepatocytes were isolated by a retrograde, nonrecirculating perfusion of livers with 0.05% Collagenase Type IV (Sigma). Cells were cultured in William's medium E with 10% fetal bovine serum but no other supplements for 2 hrs for attachment. Cells were then cultured in the same medium without serum overnight before treatment. All cells were maintained in a 37°C incubator with 5% CO<sub>2</sub>.

**Treatment with unsaturated fatty acid: palmitoleate (PO,16:1).** HepG2 cells culture and palmitoleate (PO)/BSA conjugate were prepared as described in the Materials and Methods (main text). Briefly, a 20 mM solution of PO in 0.01 N NaOH was incubated at 70 °C for 30 min, and fatty acid soaps were then complexed with 5% BSA in PBS at a 7:1 molar ratio of fatty acid to BSA. The PO/BSA conjugate was administered to the cultured cells. BSA was used as a vehicle control.

**Measurement of ROS production.** Intracellular ROS was measured with the fluoroprobe 2',7'-dichlorofluorescein diacetate (DCFH-DA) as described previously (Ding et al., 2004). Briefly, HepG2 cells were treated with OA (500 µM) or PA (500 µM) in the presence or absence of NAC (10 mM) for 6 hrs. The cells were further

incubated with 2.5  $\mu$ M DCFH-DA for 30 min at 37 °C. After DCFH incubation, ROS analysis was carried out with ROS assay kits (Green Fluorescence) (Cell BIOLABS, INC.) in a 96-well plate as modified from the manufacturer's instruction to quantitatively measure cellular ROS level using an Infinite M200 plate reader (Tecan, Durham, NC).

### **Supplementary Figure Legends**

#### **Figure S1. Differential effects of OA and PA on autophagy induction in primary**

**cultured mouse hepatocyte cells.** Primary mouse hepatocyte cells were first infected with Ad-GFP-LC3 overnight and then treated with vehicle control (5% BSA), OA (500  $\mu$ M) or PA (500  $\mu$ M) in the absence or presence of CQ (20  $\mu$ M) for 6 hrs followed by fluorescence microscopy. Representative GFP-LC3 images were shown in **(A)**. The numbers of GFP-LC3 dots per cell (mean  $\pm$  SE, n=3) were determined from 3 independent experiments and more than 20 cells were counted in each experiment **(B-C)**. **(D)** Total cell lysates were subjected to immunoblot analysis with anti-LC3 and anti- $\beta$ -Actin antibodies. Densitometry analysis for the expression level of LC3-II was performed using Image J software which was further normalized with its loading control ( $\beta$ -Actin).

#### **Figure S2. PO induces autophagy in HepG2 cells.**

HepG2 cells were first infected with Ad-GFP-LC3 (100 viral particles per cell) overnight and then treated with vehicle control (5% BSA), PO (500  $\mu$ M), PO plus CQ (20  $\mu$ M) or CQ (20  $\mu$ M) alone for 6 hrs followed by fluorescence microscopy. Representative GFP-LC3 images were shown

---

in (A). The number of GFP-LC3 dots per cell was determined (B). Data are presented as mean  $\pm$  SE from three independent experiments by counting more than 20 cells in each individual experiment. \*:  $p < 0.05$ ; #:  $p < 0.01$  (one way ANOVA with Scheffe's post-hoc test). (C) HepG2 cells were treated with vehicle control (5% BSA), PO (500  $\mu$ M), PO plus CQ (20  $\mu$ M), CQ (20  $\mu$ M) alone for 6 hrs. Total cell lysates were subjected to immunoblot analysis with anti-LC3 and anti- $\beta$ -Actin antibodies. Densitometry analysis for the expression level of LC3-II was performed using Image J software which was further normalized with its loading control ( $\beta$ -Actin). Digital data are presented as the ratio of the vehicle control (mean  $\pm$  SE) from at least three independent experiments.

**Figure S3. Fatty acid-treatment increases lipid droplet in primary mouse**

**hepatocytes.** (A) Primary mouse hepatocytes were treated with BSA vehicle control OA (500  $\mu$ M), PA (500  $\mu$ M) and PO (500  $\mu$ M) for 6 hrs and fixed with 4% paraformaldehyde. The cells were further stained with Bodipy 493/503 (0.1  $\mu$ M) for lipid droplets and Hoechst 33342 (0.5  $\mu$ g/mL) for the nuclei followed by fluorescence microscopy. (B) The number of lipid droplets per cell was quantified and data are presented as mean  $\pm$  SE from at least three independent experiments. #:  $p < 0.01$  (one way ANOVA with Scheffe's post-hoc test).

**Figure S4. Effects of NAC on fatty-acid-induced ROS production in HepG2**

**cells.** HepG2 cells were treated with vehicle control (5% BSA), OA (500  $\mu$ M), PA (500  $\mu$ M) in the presence or absence of NAC (5 mM) for 6 hrs. The cells were further incubated with 2.5  $\mu$ M DCFH-DA for 30 min at 37 °C. After DCFH incubation, ROS

---

analysis was carried out with the ROS assay kits (Green Fluorescence) (Cell BIOLABS, INC.) in a 96-well plate as modified from the manufacturer's instruction.

**Figure S5. Effects of ZVAD on PA-induced GFP-LC3 puncta formation in HepG2**

**cells.** (A) HepG2 cells were first infected with Ad-GFP-LC3 (100 viral particles per cell) overnight and then treated with vehicle control (5% BSA), PA (500  $\mu$ M), PA plus ZVAD (50  $\mu$ M) or ZVAD (50  $\mu$ M) alone for 6 hrs followed by fluorescence microscopy. (B) The number of GFP-LC3 dots per cell (mean  $\pm$  SE) was quantified from three independent experiments and more than 20 cells were counted in each individual experiment. \*:  $p < 0.05$ ; #:  $p < 0.01$  (one way ANOVA with Scheffe's post-hoc test).

**Figure S6. OA protects against PA-induced apoptosis.** HepG2 cells were treated

with OA (500  $\mu$ M), PA (500  $\mu$ M) or OA (500  $\mu$ M) plus PA (500  $\mu$ M) for 24 hrs.

Apoptotic cell death was analyzed by nuclear staining with Hoechst 33342 (mean  $\pm$  SE,  $n=3$ ).

**Figure S7. Effects of autophagy modulation on fatty acid-induced lipid**

**accumulation.** (A) HepG2 cells were treated with vehicle control (5% BSA), OA (500  $\mu$ M), OA plus 3MA (10 mM) or 3MA (10 mM) for 6 hrs. Lipid droplets were analyzed by staining with Bodipy 493/503 (0.1  $\mu$ M) and the number of lipid droplets per cell was quantified (mean  $\pm$  SE) from three independent experiments. (B) HepG2 cells were treated with vehicle control (5% BSA), OA (500  $\mu$ M) in the presence or absence of rapamycin (Rap, 10  $\mu$ M) for 6 hrs. The cellular TG contents were quantified (mean  $\pm$  SE) from three independent experiments.

A

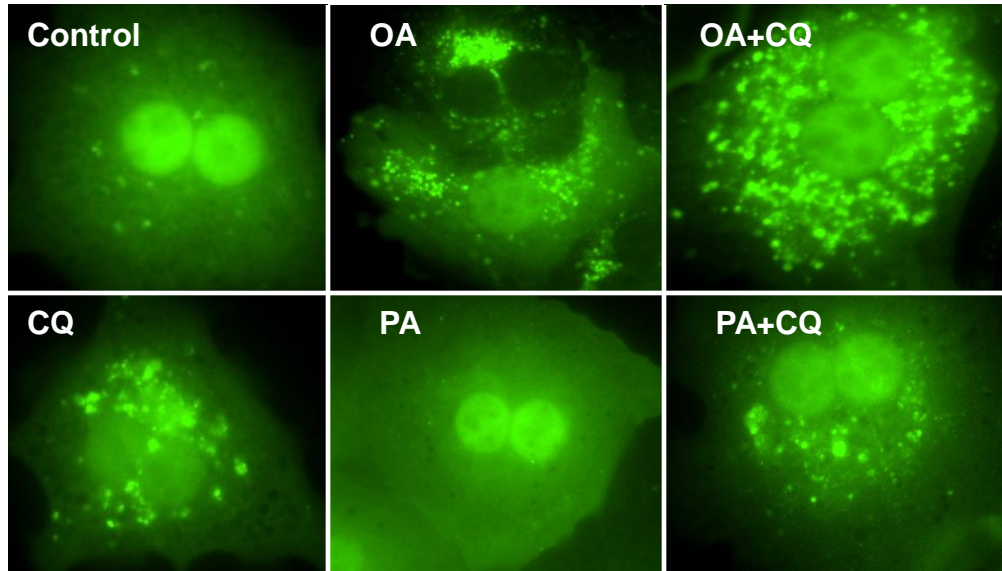

B

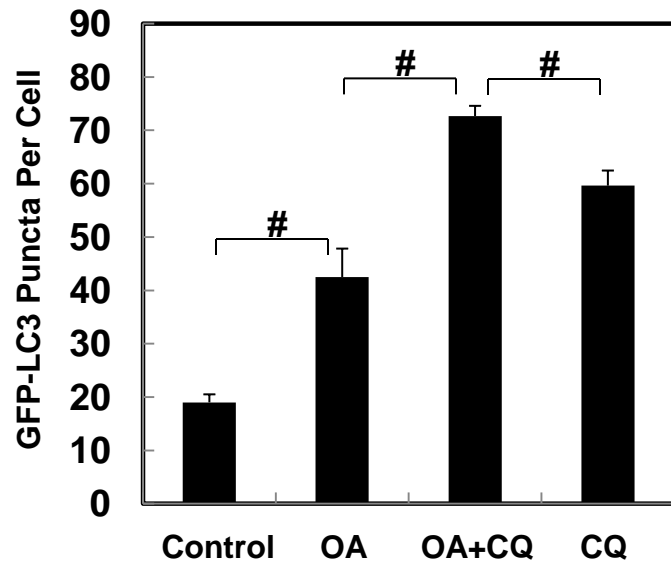

C

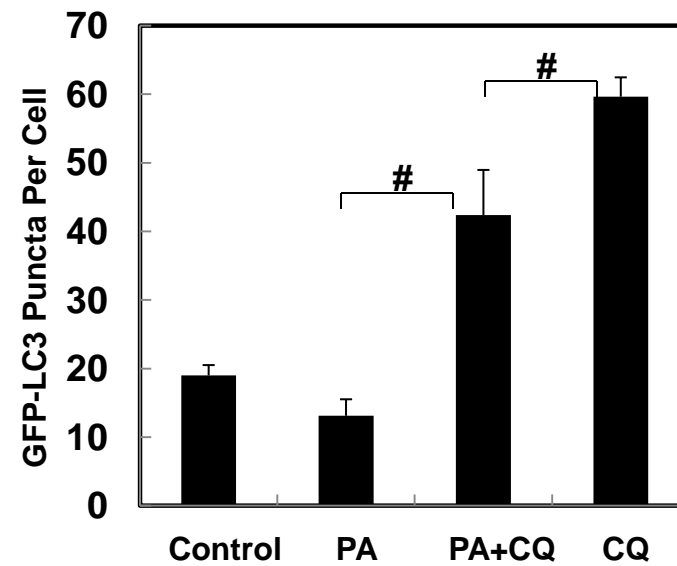

# Supplemental Figure 1

**D**

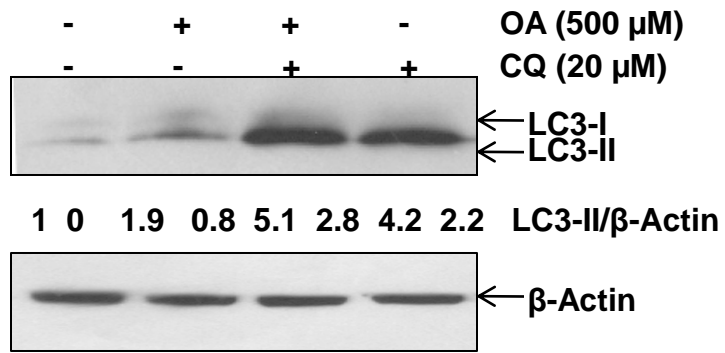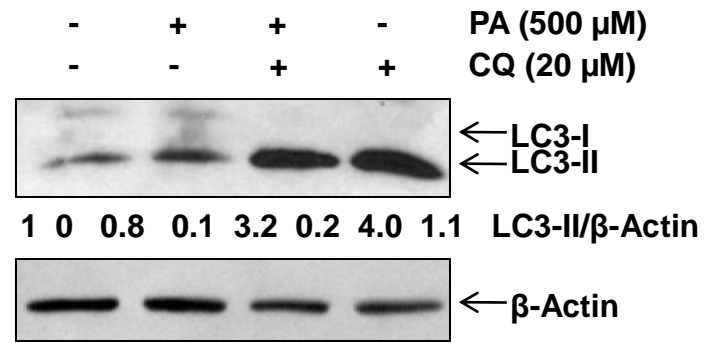

A

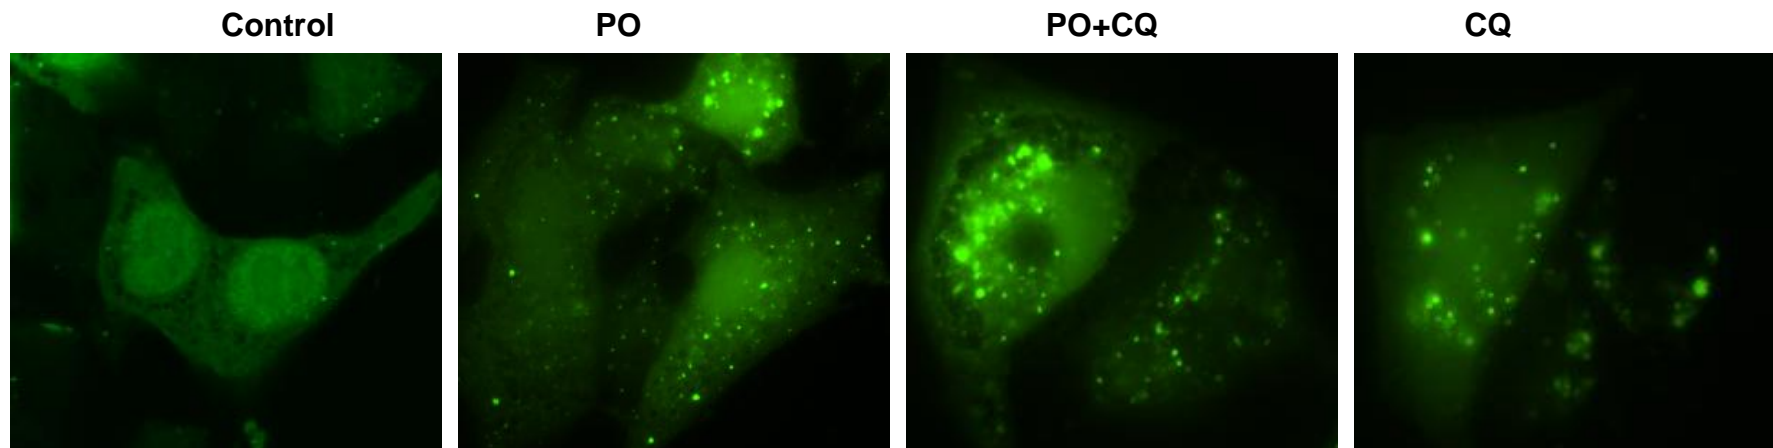

B

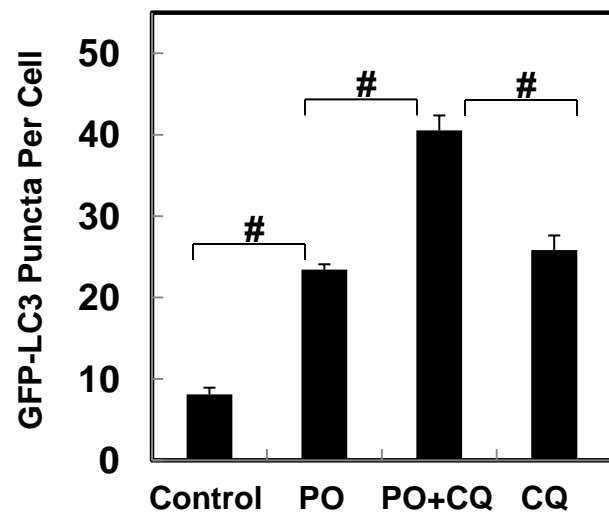

C

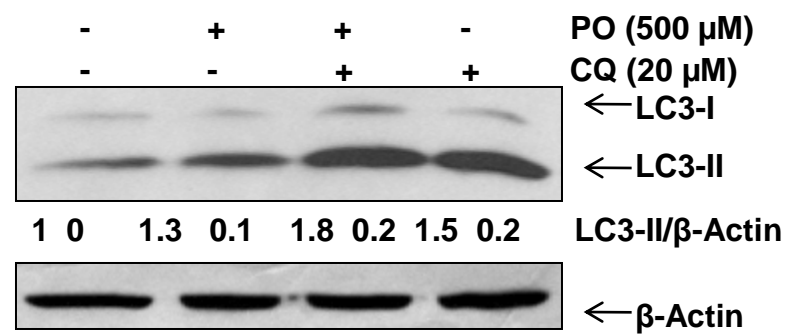

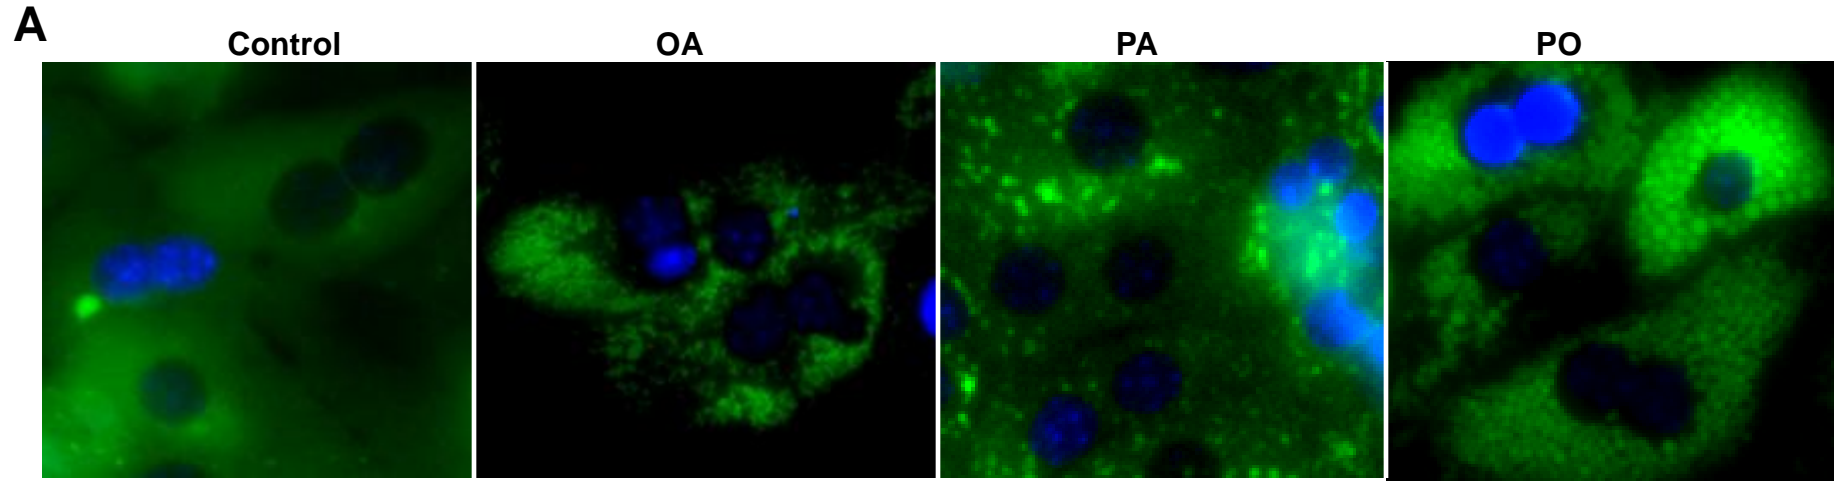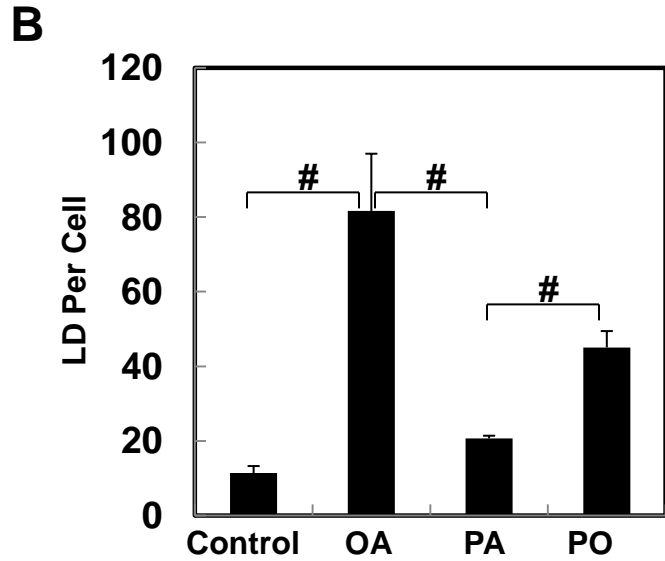



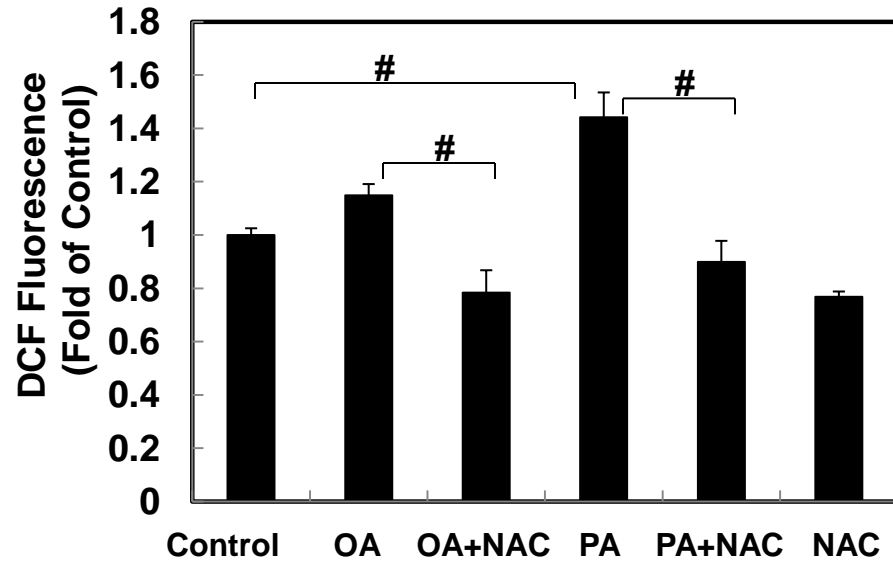

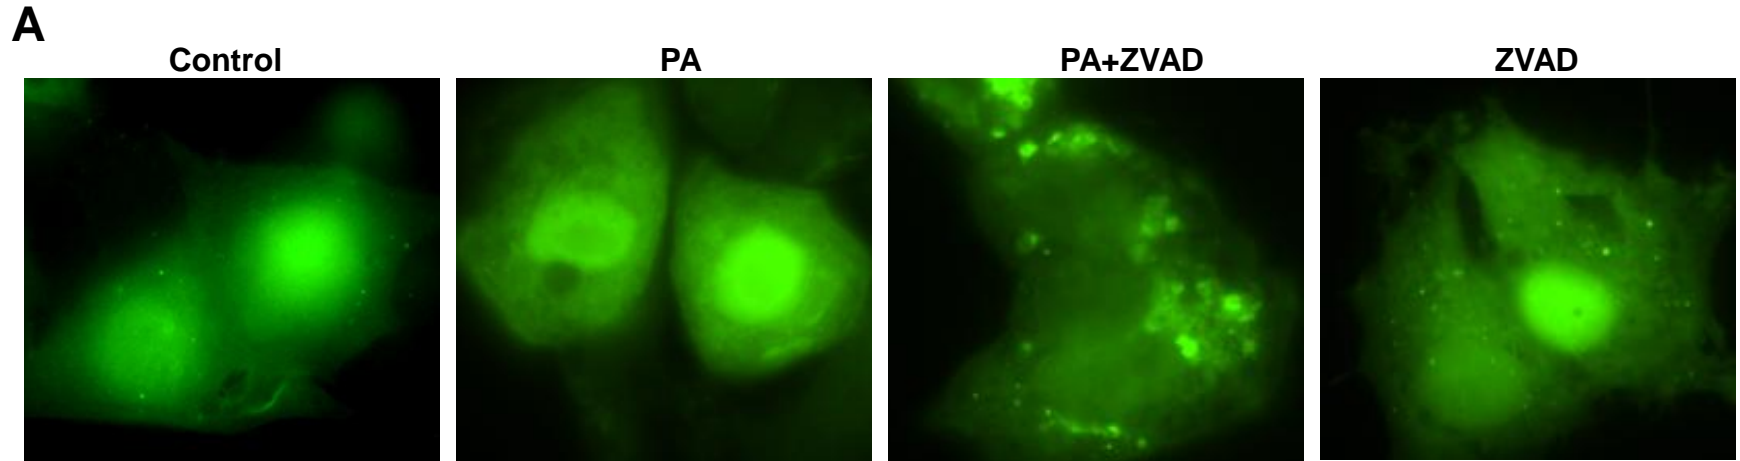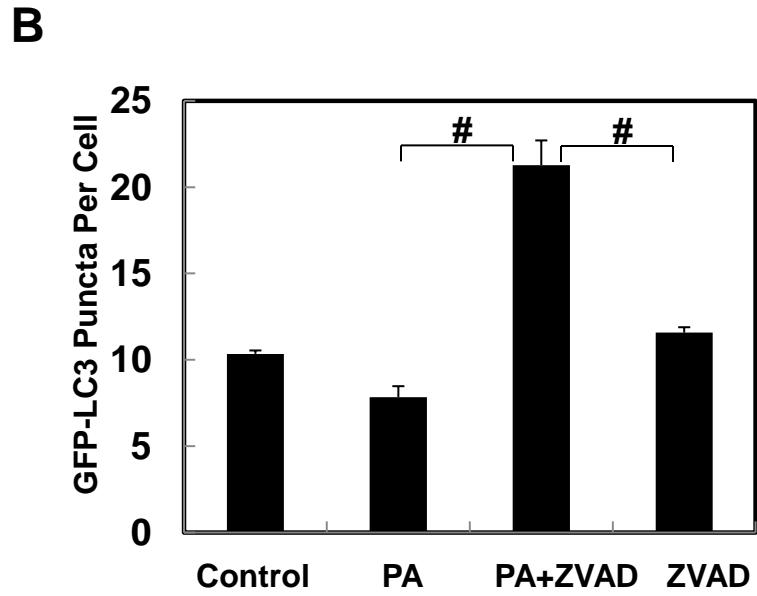

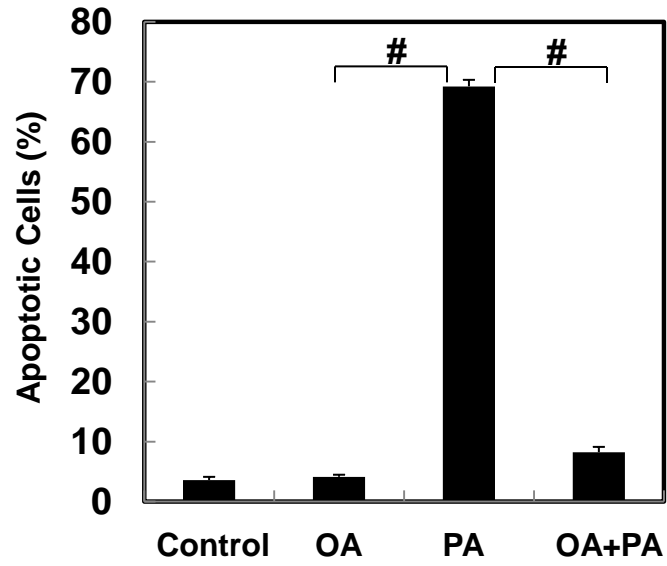

**A**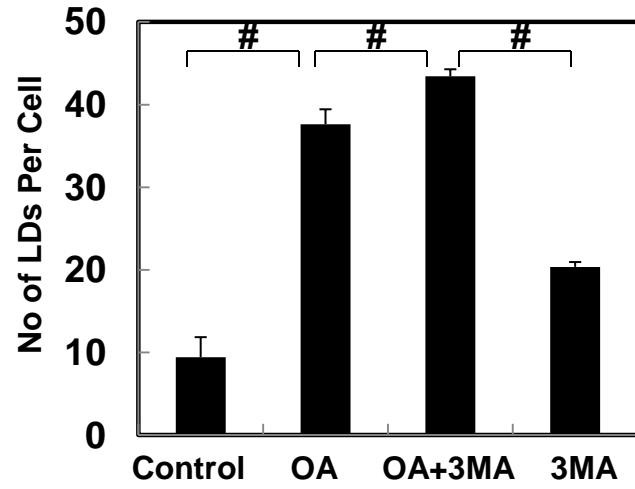**B**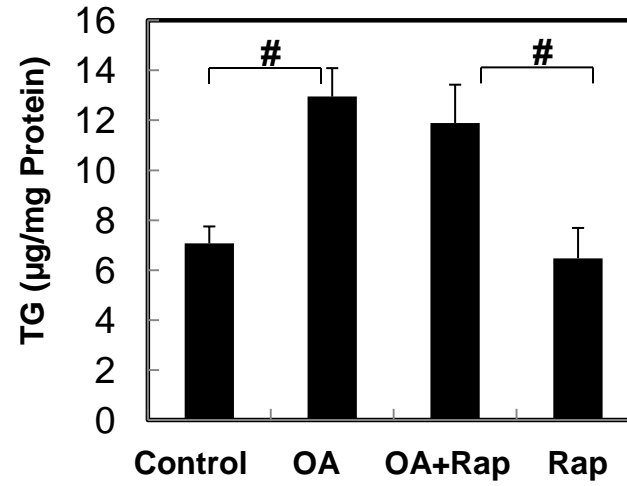

Supplement: supp_111.184341_jpet184341supplemental_figures.pdf [file supp_111.184341_jpet184341supplemental_figures.pdf]
